# Supplementary material for: Plasma and brain pharmacokinetics of previously unexplored lithium salts
Source: Royal Society of Chemistry journal article supplement (doi:10.1039/c3ra46962j), 2014-01-01

## **Plasma and brain pharmacokinetics of previously unexplored lithium salts**

*Adam J. Smith<sup>1,†</sup>, Seol-Hee Kim<sup>1</sup>, Jun Tan<sup>2</sup>, Kevin B. Sneed<sup>3</sup>, Paul R. Sanberg<sup>1</sup>, Cesar V. Borlongan<sup>1</sup>, R. Douglas Shytle<sup>1</sup>*

<sup>1</sup>Center of Excellence for Aging and Brain Repair, Department of Neurosurgery and Brain Repair, Morsani College of Medicine, University of South Florida, Tampa, FL

<sup>2</sup>Rashid Laboratory for Developmental Neurobiology, Silver Child Development Center, Department of Psychiatry and Behavioral Neurosciences, Morsani College of Medicine, University of South Florida, Tampa, FL

<sup>3</sup>College of Pharmacy, University of South Florida, Tampa, FL

<sup>†</sup>Dr. Adam Smith, Center of Excellence for Aging and Brain Repair, MDC78, Department of Neurosurgery and Brain Repair, University of South Florida, College of Medicine, Tampa, FL, USA 33612, Phone: 813-974-1452; Fax: 813-974-3078; Email: [asmith1@health.usf.edu](mailto:asmith1@health.usf.edu)

### **Supplementary information:**

Powder X-ray Diffraction for Lithium Salicylate and Lithium Lactate

**Experimental Powder X-ray Diffraction of Lithium Salicylate (Bruker  
DIFFRAC.EVA v2.1)**

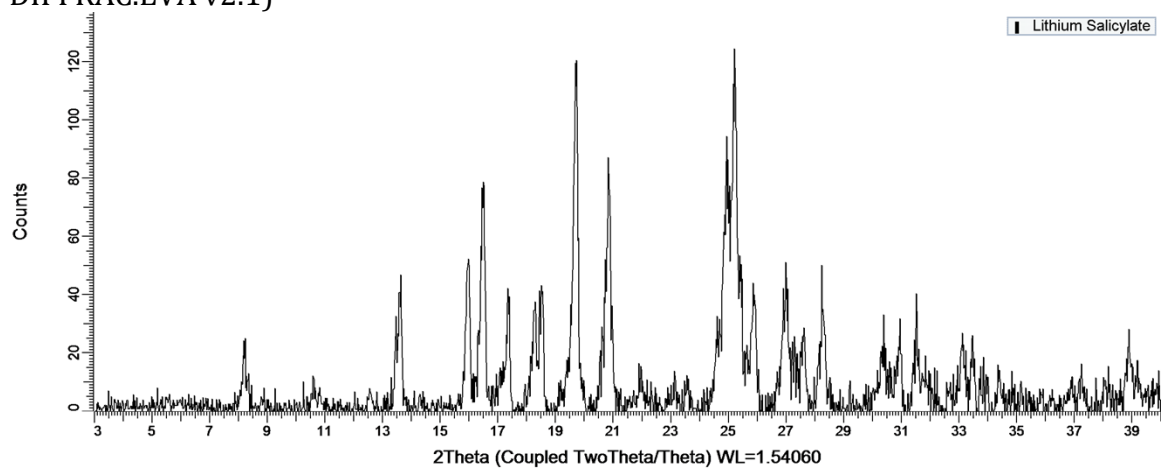

**Experimental Powder X-ray Diffraction of Lithium Lactate (Bruker  
DIFFRAC.EVA v2.1)**

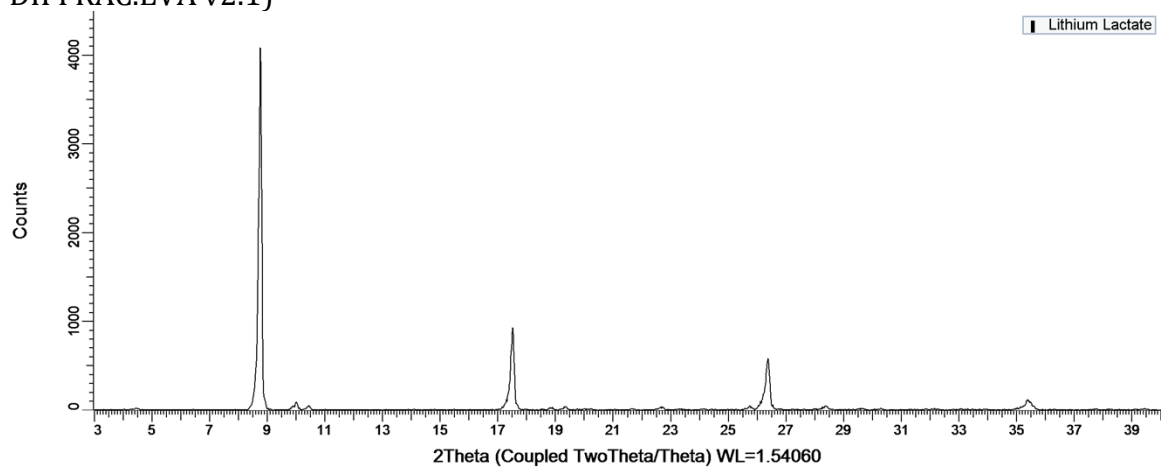

Supplement: c3ra46962j1.pdf [file c3ra46962j1.pdf]
